# Supplementary material for: Identification of Leukemia-Associated Immunophenotypes by Databaseguided Flow Cytometry Provides a Highly Sensitive and Reproducible Strategy for the Study of Measurable Residual Disease in Acute Myeloblastic Leukemia
Source: MDPI journal article supplement (doi:10.3390/cancers14164010), 2022-08-19
Supplement: s1 [file s1]

**Supplementary Table S1.**

|                                                                |           |
|----------------------------------------------------------------|-----------|
| <b>Patients eligible for MRD study (CR1 after 3+7 regimen)</b> | <b>75</b> |
| <b>Post-remission therapy</b>                                  |           |
| Chemotherapy alone                                             | 54        |
| ATSP                                                           | 10        |
| Allo-TMO                                                       | 11        |
| <b>MRD controls</b>                                            |           |
| MRD-MFC post cycle 1                                           | 75        |
| MRD-MFC and qPCR post cycle 1                                  | 42        |
| Successive MRD-MFC and qPCR monitoring                         | 161       |
| MRD-MFC and qPCR post cycle 2                                  | 39        |
| MRD-MFC and qPCR post cycle 3 or +                             | 69        |
| <b>Patients non eligible for MRD study</b>                     | <b>70</b> |
| <b>Induction Chemotherapy</b>                                  |           |
| 3+7 regimen (no CR)                                            | 22        |
| ATRA based regimens (acute promyelocytic leukemia)             | 11        |
| 5-azacytidine based regimens                                   | 15        |
| Other treatments                                               | 9         |
| Palliative care                                                | 9         |
| Early deaths                                                   | 4         |
| <b>Post-remission therapy</b>                                  |           |
| Chemotherapy                                                   | 21        |
| ATSP                                                           | 5         |
| Allo-TMO                                                       | 6         |

**Supplementary Table S2.**

|           | <b>Specificity</b><br>mean (range) | <b>&lt;0.01%</b> | <b>≥0.01-0.1%</b> | <b>&gt;0.1</b> |
|-----------|------------------------------------|------------------|-------------------|----------------|
| <b>T1</b> | 0,0845 (0,0002636- 1,24165)        | 28 (32%)         | 43 (49%)          | 16 (18%)       |
| <b>T2</b> | 0,1035 (0,0009616- 2,6067938)      | 17 (16%)         | 49 (46%)          | 34 (32%)       |
| <b>T3</b> | 0,0843 (0,00020497- 3,547254)      | 43 (42%)         | 43 (42%)          | 15 (15%)       |
| <b>T4</b> | 0,1104 (0,000247- 2,54468)         | 27 (30%)         | 45 (50%)          | 18 (20%)       |
| <b>T5</b> | 0,0814 (0,0002615- 2,215884)       | 30 (30%)         | 48 (48%)          | 21 (21%)       |
| <b>T6</b> | 0,0481 (0,00066- 0,8041249)        | 39 (39%)         | 50 (50%)          | 11 (11%)       |

Number of different LAIPs detected in the 6 first combinations of the AML/MDS panel. LAIPs were classified in 3 categories of specificity: strong, good and weak (<0.01%, ≥0.01-0.1% and >0.1). General specificity (mean + range) of LAIPs in each single combination.

\*T1-6: tube 1-6
